# Supplementary material for: Association between genetic variants in the XPG gene and gastric cancer risk in a Southern Chinese population
Source: PubMed Central journal article supplement (PMC5270670; doi:10.18632/aging.101119), 2016-12-06
Supplement: aging-08-3311-s001.pdf [file aging-08-3311-s001.pdf]

## SUPPLEMENTARY MATERIAL

**Supplemental Table S1. Frequency distribution of selected characteristics in gastric cancer cases and controls.**

| Variables       | Cases (n=1142) |       | Controls (n=1173) |       | <i>P</i> <sup>a</sup> |
|-----------------|----------------|-------|-------------------|-------|-----------------------|
|                 | No             | %     | No.               | %     |                       |
| Gender          |                |       |                   |       | 0.393                 |
| Males           | 749            | 65.59 | 789               | 67.26 |                       |
| Females         | 393            | 34.41 | 384               | 32.74 |                       |
| Age range, yr   | 15-86          |       | 16-80             |       | <0.0001               |
| Mean ± SD       | 56.25 ± 12.49  |       | 45.19 ± 11.56     |       |                       |
| ≤ 50            | 334            | 29.25 | 789               | 67.26 |                       |
| 51-60           | 362            | 31.70 | 285               | 24.30 |                       |
| 61-70           | 312            | 27.32 | 73                | 6.22  |                       |
| >70             | 134            | 11.73 | 26                | 2.22  |                       |
| Smoking status  |                |       |                   |       | <0.0001               |
| Never           | 735            | 64.36 | 662               | 56.44 |                       |
| Ever            | 407            | 35.64 | 511               | 43.56 |                       |
| Pack-years      |                |       |                   |       | <0.0001               |
| 0               | 735            | 64.36 | 662               | 56.44 |                       |
| ≤ 30 (mean)     | 272            | 23.82 | 383               | 32.65 |                       |
| > 30 (mean)     | 135            | 11.82 | 128               | 10.91 |                       |
| Drinking status |                |       |                   |       | <0.0001               |
| No              | 934            | 81.79 | 600               | 51.15 |                       |
| Yes             | 208            | 18.21 | 573               | 48.85 |                       |
| Sites           |                |       |                   |       |                       |
| Cardia          | 240            | 21.02 | /                 | /     |                       |
| Non-cardia      | 902            | 78.98 | /                 | /     |                       |
| TNM Stage       |                |       |                   |       |                       |
| I               | 140            | 12.26 | /                 | /     |                       |
| II              | 329            | 28.81 | /                 | /     |                       |
| III             | 456            | 39.93 | /                 | /     |                       |
| IV              | 217            | 19.00 | /                 | /     |                       |

<sup>a</sup> Two-sided  $\chi^2$  test for distributions between gastric cancer cases and controls.

**Supplemental Table S2. The potential functions of the five SNPs selected in *XPG* gene as predicted by SNPinfo (<http://snpinfo.niehs.nih.gov/snpinfo/snpfunc.htm>) software.**

| rs        | Chr | Allele | Position <sup>a</sup> | Location        | TFBS | Splicing<br>(ESE or ESS) | miRNA<br>(miRanda) | miRNA<br>(Sanger) | Allele | Asian | CHB   |
|-----------|-----|--------|-----------------------|-----------------|------|--------------------------|--------------------|-------------------|--------|-------|-------|
| rs2094258 | 13  | C/T    | 102294760             | 5' near<br>gene | Y    | --                       | --                 | --                | C      | 0.627 | 0.661 |
| rs751402  | 13  | C/T    | 102296199             | 5' UTR          | Y    | Y                        | --                 | --                | C      | 0.591 | 0.619 |
| rs2296147 | 13  | T/C    | 102296376             | 5' UTR          | Y    | --                       | --                 | --                | T      | 0.838 | 0.768 |
| rs1047768 | 13  | T/C    | 102302518             | exon            | --   | Y                        | --                 | --                | T      | 0.778 | 0.720 |
| rs873601  | 13  | G/A    | 102326338             | 3' UTR          | --   | Y                        | Y                  | Y                 | G      | 0.517 | 0.464 |

<sup>a</sup> The position is based on HapMap Data Rel 27 Phase II+III, Feb09, on NCBI B36 assembly, dbSNP b126

SNP, single nucleotide polymorphism; *XPG*, xeroderma pigmentosum group G; TFBS, transcription factor binding site; ESE, exon splicing enhancer; ESS, exon splicing silencer; CHB, Han Chinese in Beijing, China; UTR, untranslated region.
